# Supplementary material for: A role for GABA in the modulation of striatal and hippocampal systems under stress
Source: PubMed Central journal article supplement (PMC8413374; doi:10.1038/s42003-021-02535-x), 2021-09-02
Supplement: 42003_2021_2535_MOESM2_ESM.pdf [file 42003_2021_2535_MOESM2_ESM.pdf]

## Description of Additional Supplementary files

**File name:** Supplementary Data 1

**Description:** Source data for Figures.
